# Supplementary material for: Ball-lens assisted sensitivity improvement of fluorescence immunoassay in microchannels
Source: Royal Society of Chemistry journal article supplement (doi:10.1039/d1ra04360a), 2021-01-01
Supplement: d1ra04360a1.pdf [file d1ra04360a1.pdf]

## Supporting information

### Ball-lens assisted sensitivity improvement of fluorescence immuno-assay in microchannel

Qingquan Zhang<sup>a†</sup>, Jiajia Li<sup>a†</sup>, Yuting Su<sup>a</sup>, Xiaoyan Pan<sup>b</sup>, Hongwei Gai<sup>a\*</sup>.

a. Jiangsu Key Laboratory of Green Synthesis for Functional Materials, School of Chemistry and Materials Science, Jiangsu Normal University, Xuzhou, Jiangsu 221116, China.

b. Department of Laboratory Medicine, The Second Affiliated Hospital of Zhejiang University School of Medicine, Hangzhou 310009, China.

E-mail: gai@jsnu.edu.cn

† These authors contributed equally.

#### Table of contents

**Fig. S1** Modified process flow of microdevice fabrication.

**Fig. S2** The focusing process of the ball-lens and the microchannel.

**Fig. S3** Simulation of ball-lens function using ZEMAX software.

**Tab. S1** The review of CEA analysis in the microfluidic devices.

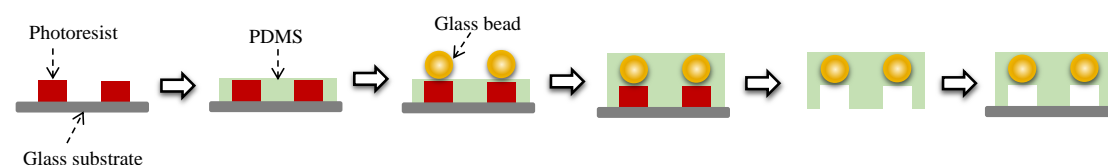

**Fig. S1.** Modified process flow of microdevice fabrication.

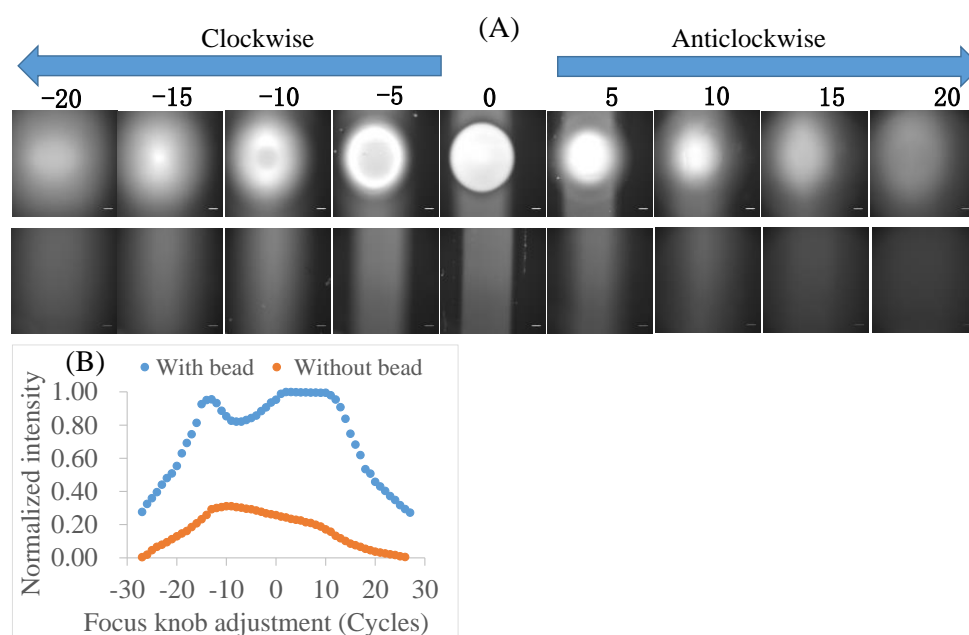

**Fig. S2.** The focusing process of the ball-lens and the microchannel. (A) The original images in the absence of the bead and bead-enhanced images. (B) Plots of normalized intensity against focusing adjusting cycles. ‘0’ represent the best focusing position. The other numbers represent the adjusting cycles of focusing knob from the best focusing position. Positive and negative represent rotational direction.

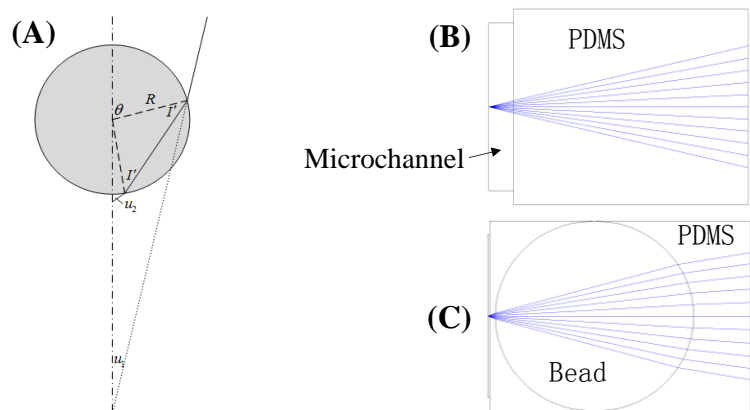

**Fig. S3.** Simulation of ball-lens function using ZEMAX software. (A) Light-ray tracing of photons emitted from point source undergoing lensing through a ball-lens. (B) Simulation result without the ball-lens. (C) Simulation result with the ball-lens. Simulation parameters: bead diameter is  $700\ \mu\text{m}$  ( $n=1.9$ ). The surrounding medium of the bead is PDMS ( $n=1.45-1.46$ ). The channel width is  $600\ \mu\text{m}$  and filled with fluorescent dye solute ( $n=1.33$ ). The PDMS membrane thickness between the bead and the microchannel is  $\sim 20\ \mu\text{m}$ . The numerical aperture (NA) of  $10\times$  objective is 0.3.

**Table. S1** The review of CEA analysis in the microfluidic devices.

| Number | Biomarker | LOD         | Labelling            | Detection                  | Reference                                                          |
|--------|-----------|-------------|----------------------|----------------------------|--------------------------------------------------------------------|
| 1      | CEA       | 0.068 ng/mL | Fluorescein amidite  | Fluorescence               | B. Li, et al. Clinica Chimica Acta, 2015, 450, 304-309.            |
| 2      | CEA       | 0.19 ng/mL  | Quantum dots         | Fluorescence               | L. Liu, et al. Biosensors and Bioelectronics, 2016, 80, 300-306    |
| 3      | CEA       | 0.03 ng/mL  | Colloidal gold       | Thermal lens microscope    | K. Sato, et al. Analytical Chemistry, 2001, 73, 1213-1218.         |
| 4      | CEA       | 0.19 ng/mL  | IRDye800             | Near-infrared fluorescence | B. Liu, et al. Advanced Functional Materials, 2016, 26, 7994-8002. |
| 5      | CEA       | 0.41 ng/mL  | Alkaline phosphatase | Chemiluminescent           | W. Wei, et al. Anal Bioanal Chem, 2011, 401, 3269-3274             |
| 6      | CEA       | 5.0 ng/mL   | No                   | Plasmonic wavelength shift | J. Zhou, et al. Nanophotonics, 2019, 8, 307-316.                   |
